# Supplementary material for: Alcohol-and-HIV-Induced Lysosomal Dysfunction Regulates Extracellular Vesicles Secretion in Vitro and in Liver-Humanized Mice
Source: MDPI journal article supplement (doi:10.3390/biology10010029), 2021-01-05

1.Full western blot images related to figure 1d

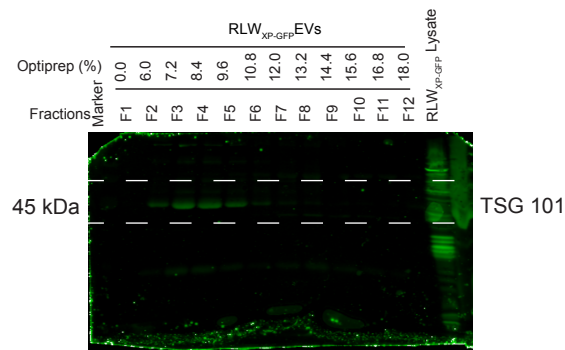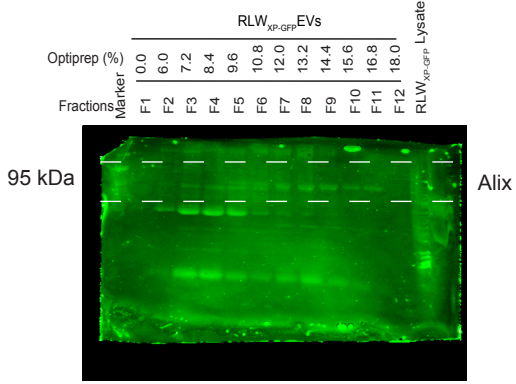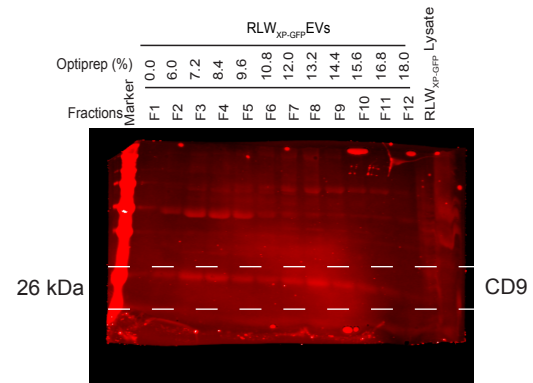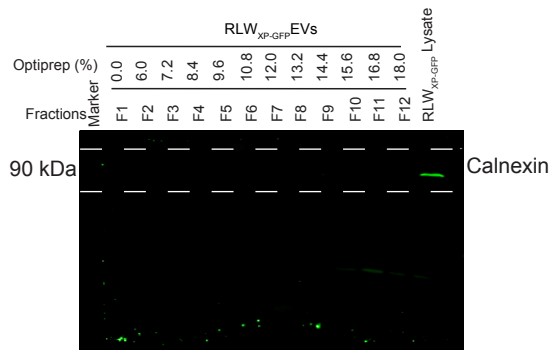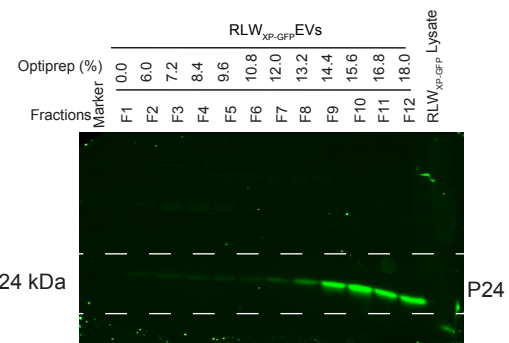

**2. Raw western blot images related to figure 4f:** Images were captured on Licor imaging system (top) and bio-rad chemidoc system. White dotted box represents the proteins of interest and red dotted box represents the representative blot.

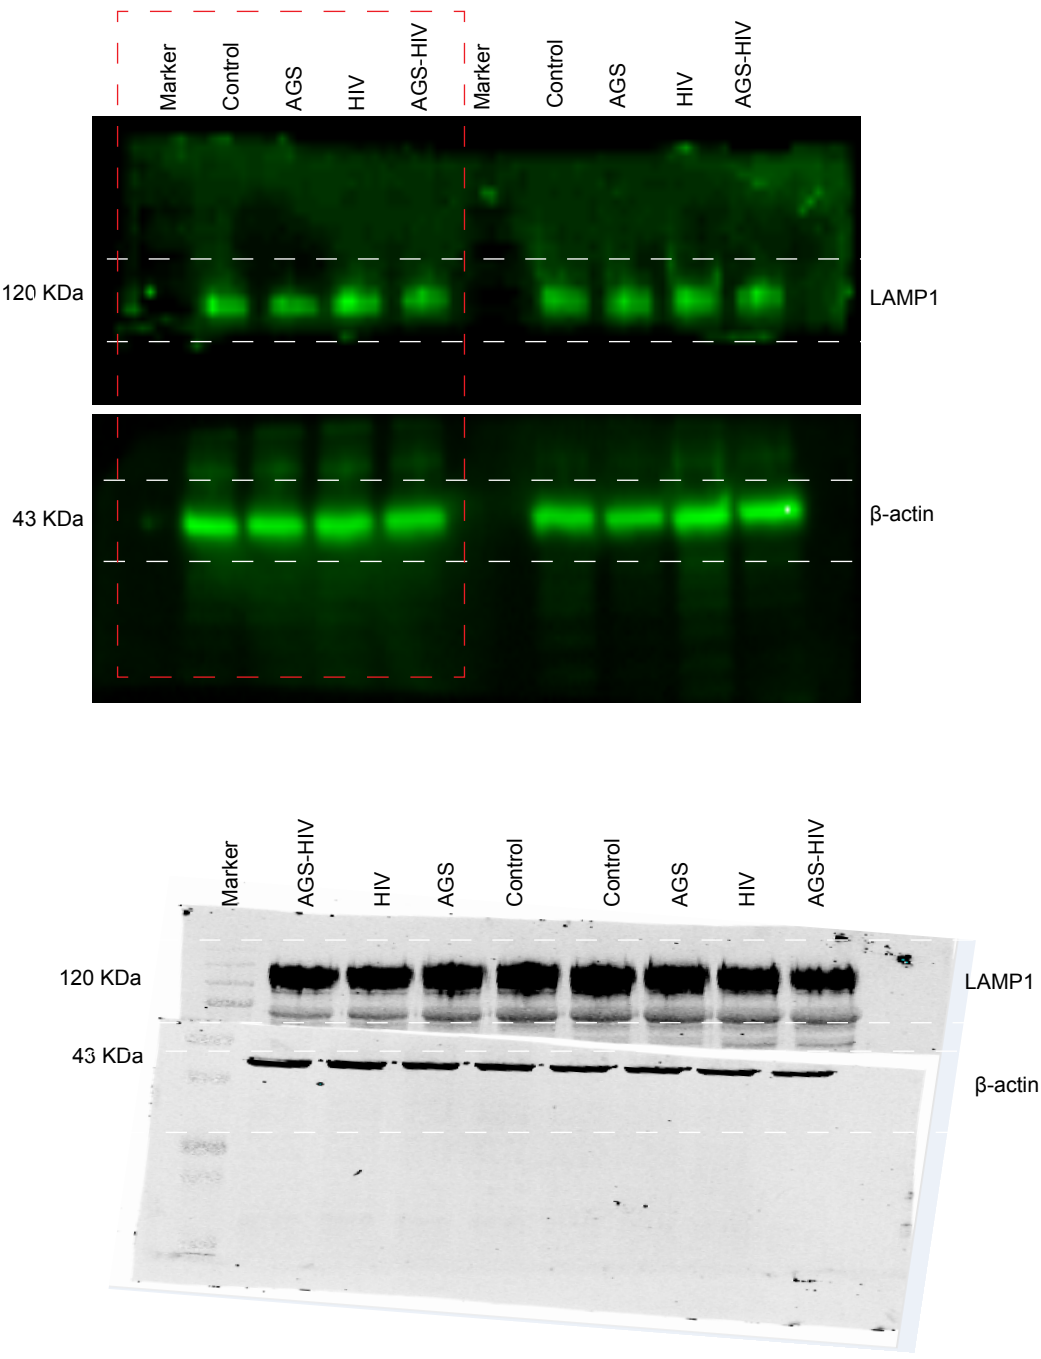



4. **Western blot images related to figure 5e:** Images were captured on Bio-Rad chemidoc system and red dotted box represents the representative blot and black box represent protein of interest.

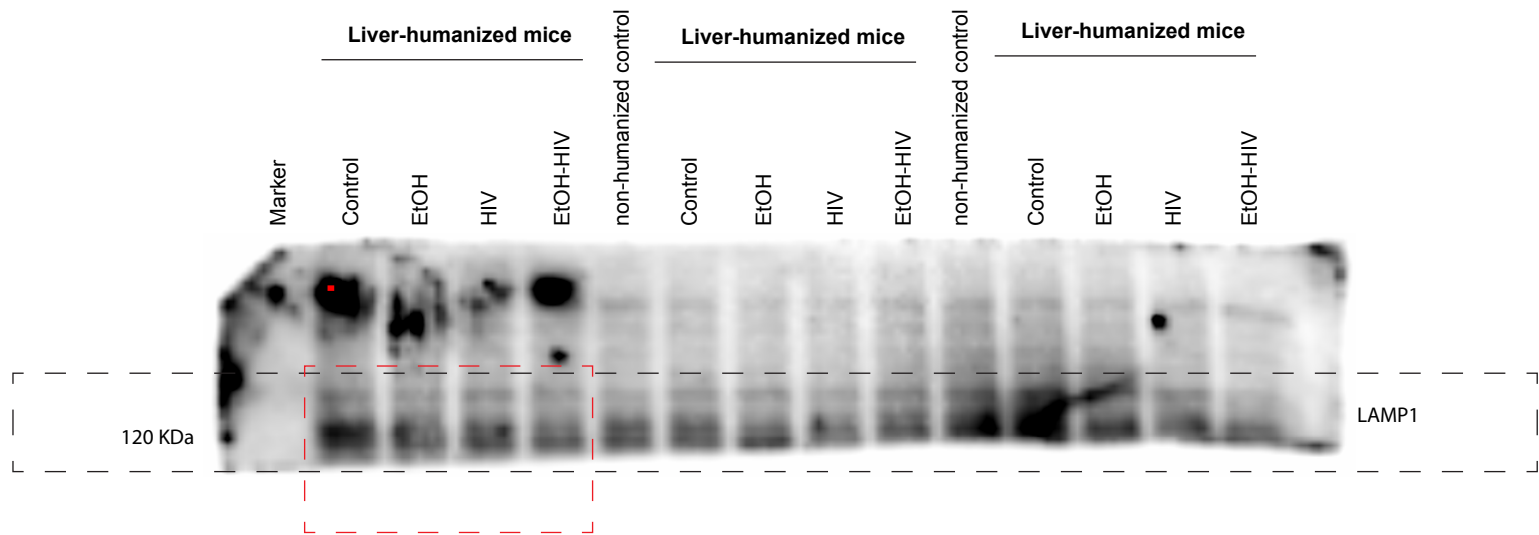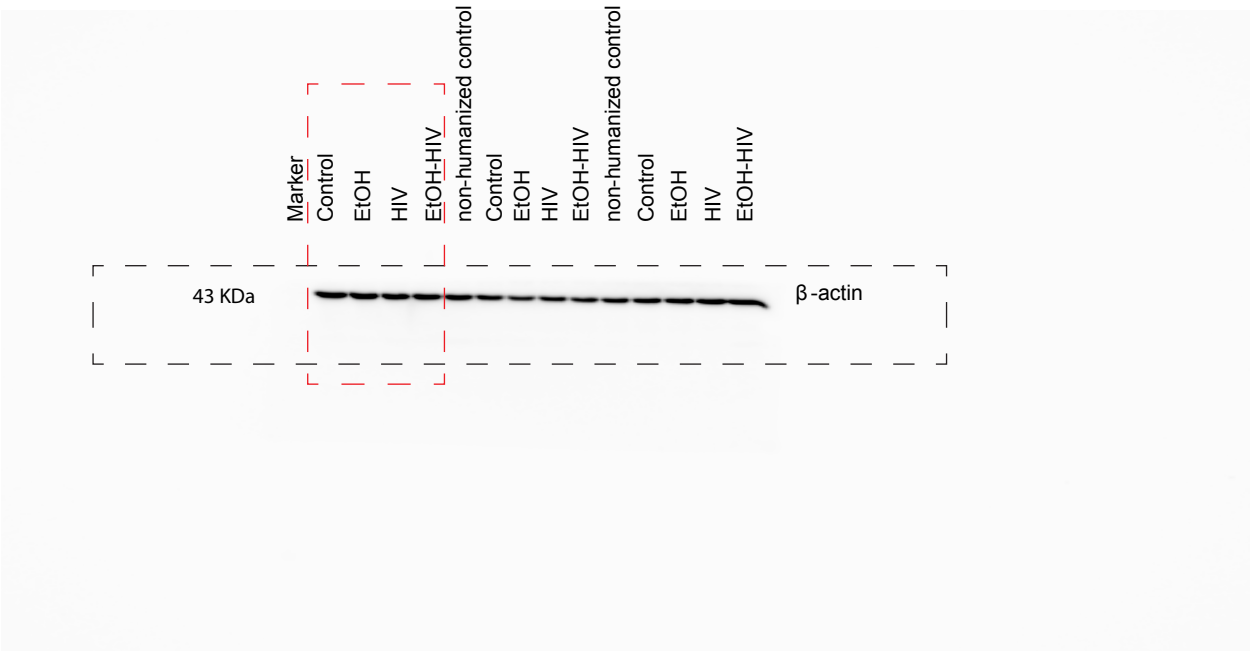

Supplement: s1 [file s1]
